# Supplementary material for: Polyethylenimine-interlayered silver-shell magnetic-core microspheres as multifunctional SERS substrates
Source: Royal Society of Chemistry journal article supplement (doi:10.1039/c5tc01839k), 2015-01-01
Supplement: c5tc01839k1.pdf [file c5tc01839k1.pdf]

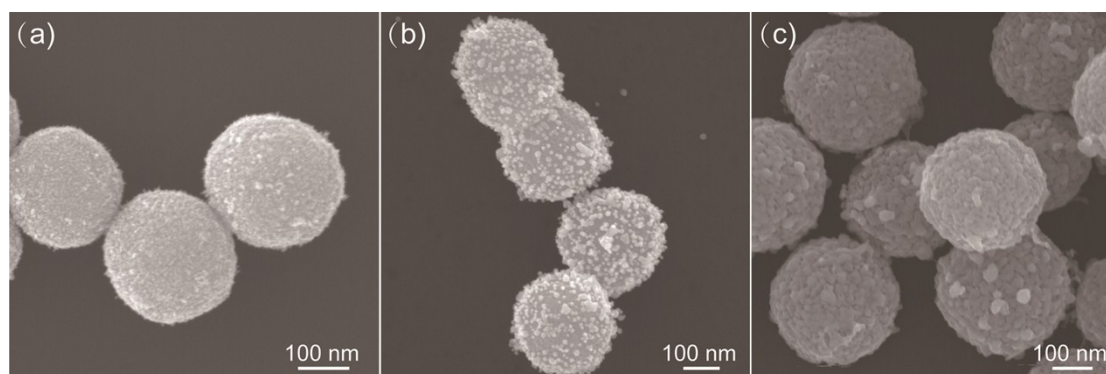

**Figure S1.** SEM images of  $\text{Fe}_3\text{O}_4@\text{PEI}@\text{Ag}$  microspheres synthesized with different amount of  $\text{AgNO}_3$ : (a) 0 mg, (b) 1.5 mg, and (c) 4 mg, respectively.
